# Supplementary material
Source: Springer Nature journal article supplement (https://www.springermedizin.de/resource/supplementary/12913_2009_1288_MOESM1_ESM.pdf/9527778)

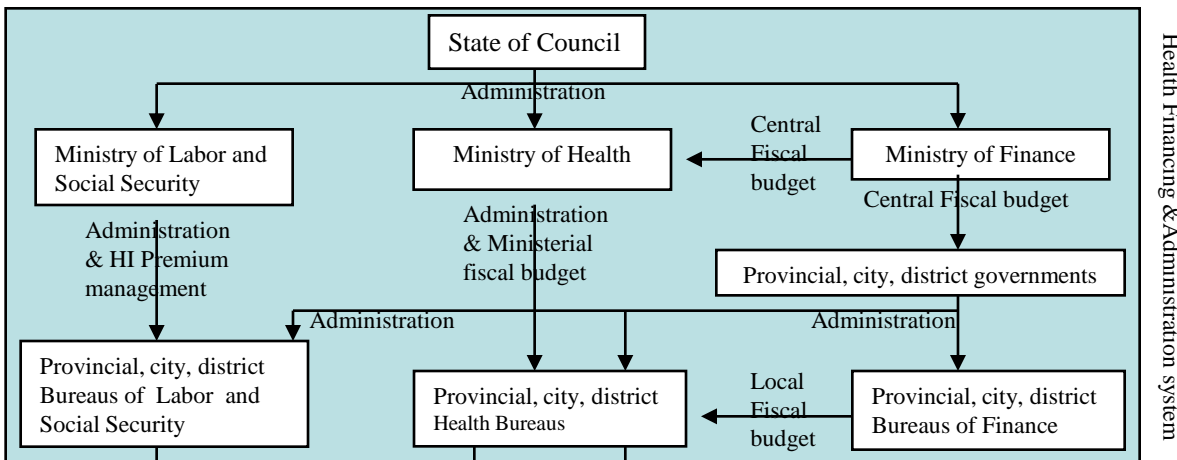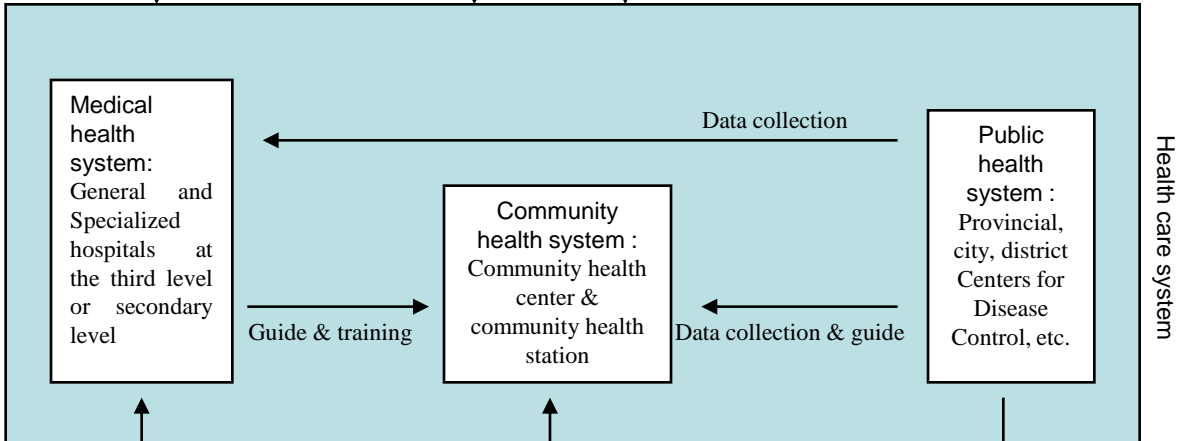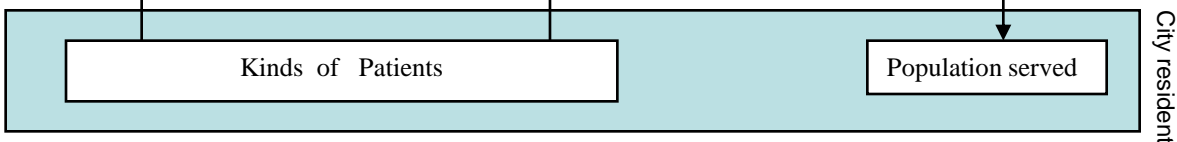

Supplement: MOESM1 [file 9527778]
